# Supplementary material for: Boreal forest BVOC exchange: emissions versus in-canopy sinks
Source: Copernicus journal article supplement (doi:10.5194/acp-17-14309-2017), 2017-12-04
Supplement: Supplementary file 1 [file acp-17-14309-2017-supplement.zip]

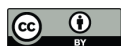

## *Supplement of*

# **Boreal forest BVOC exchange: emissions versus in-canopy sinks**

**Putian Zhou et al.**

*Correspondence to:* Putian Zhou ([putian.zhou@helsinki.fi](mailto:putian.zhou@helsinki.fi))

- `acp-17-14309-2017-supplement-title-page.pdf`
- `BVOC-Hcp_final.out`
- `BVOC-episuite.in`
- `BVOC-episuite.out`
- `BVOC-second_Parameters.f90`
- `Hcp.f90`
- `README.txt`
- `get_H_f0.py`
- `mcm_smiles.txt`
- `smiles2group.py`
- `smiles2group.pyc`

The copyright of individual parts of the supplement might differ from the CC BY 3.0 License.
